# Supplementary figures and images for: Implications of magnetic dilution of PrFeO3 with Bi3+ on its dielectric and magnetic properties
Source: Royal Society of Chemistry journal article supplement (doi:10.1039/d5cp00004a), 2025-01-01

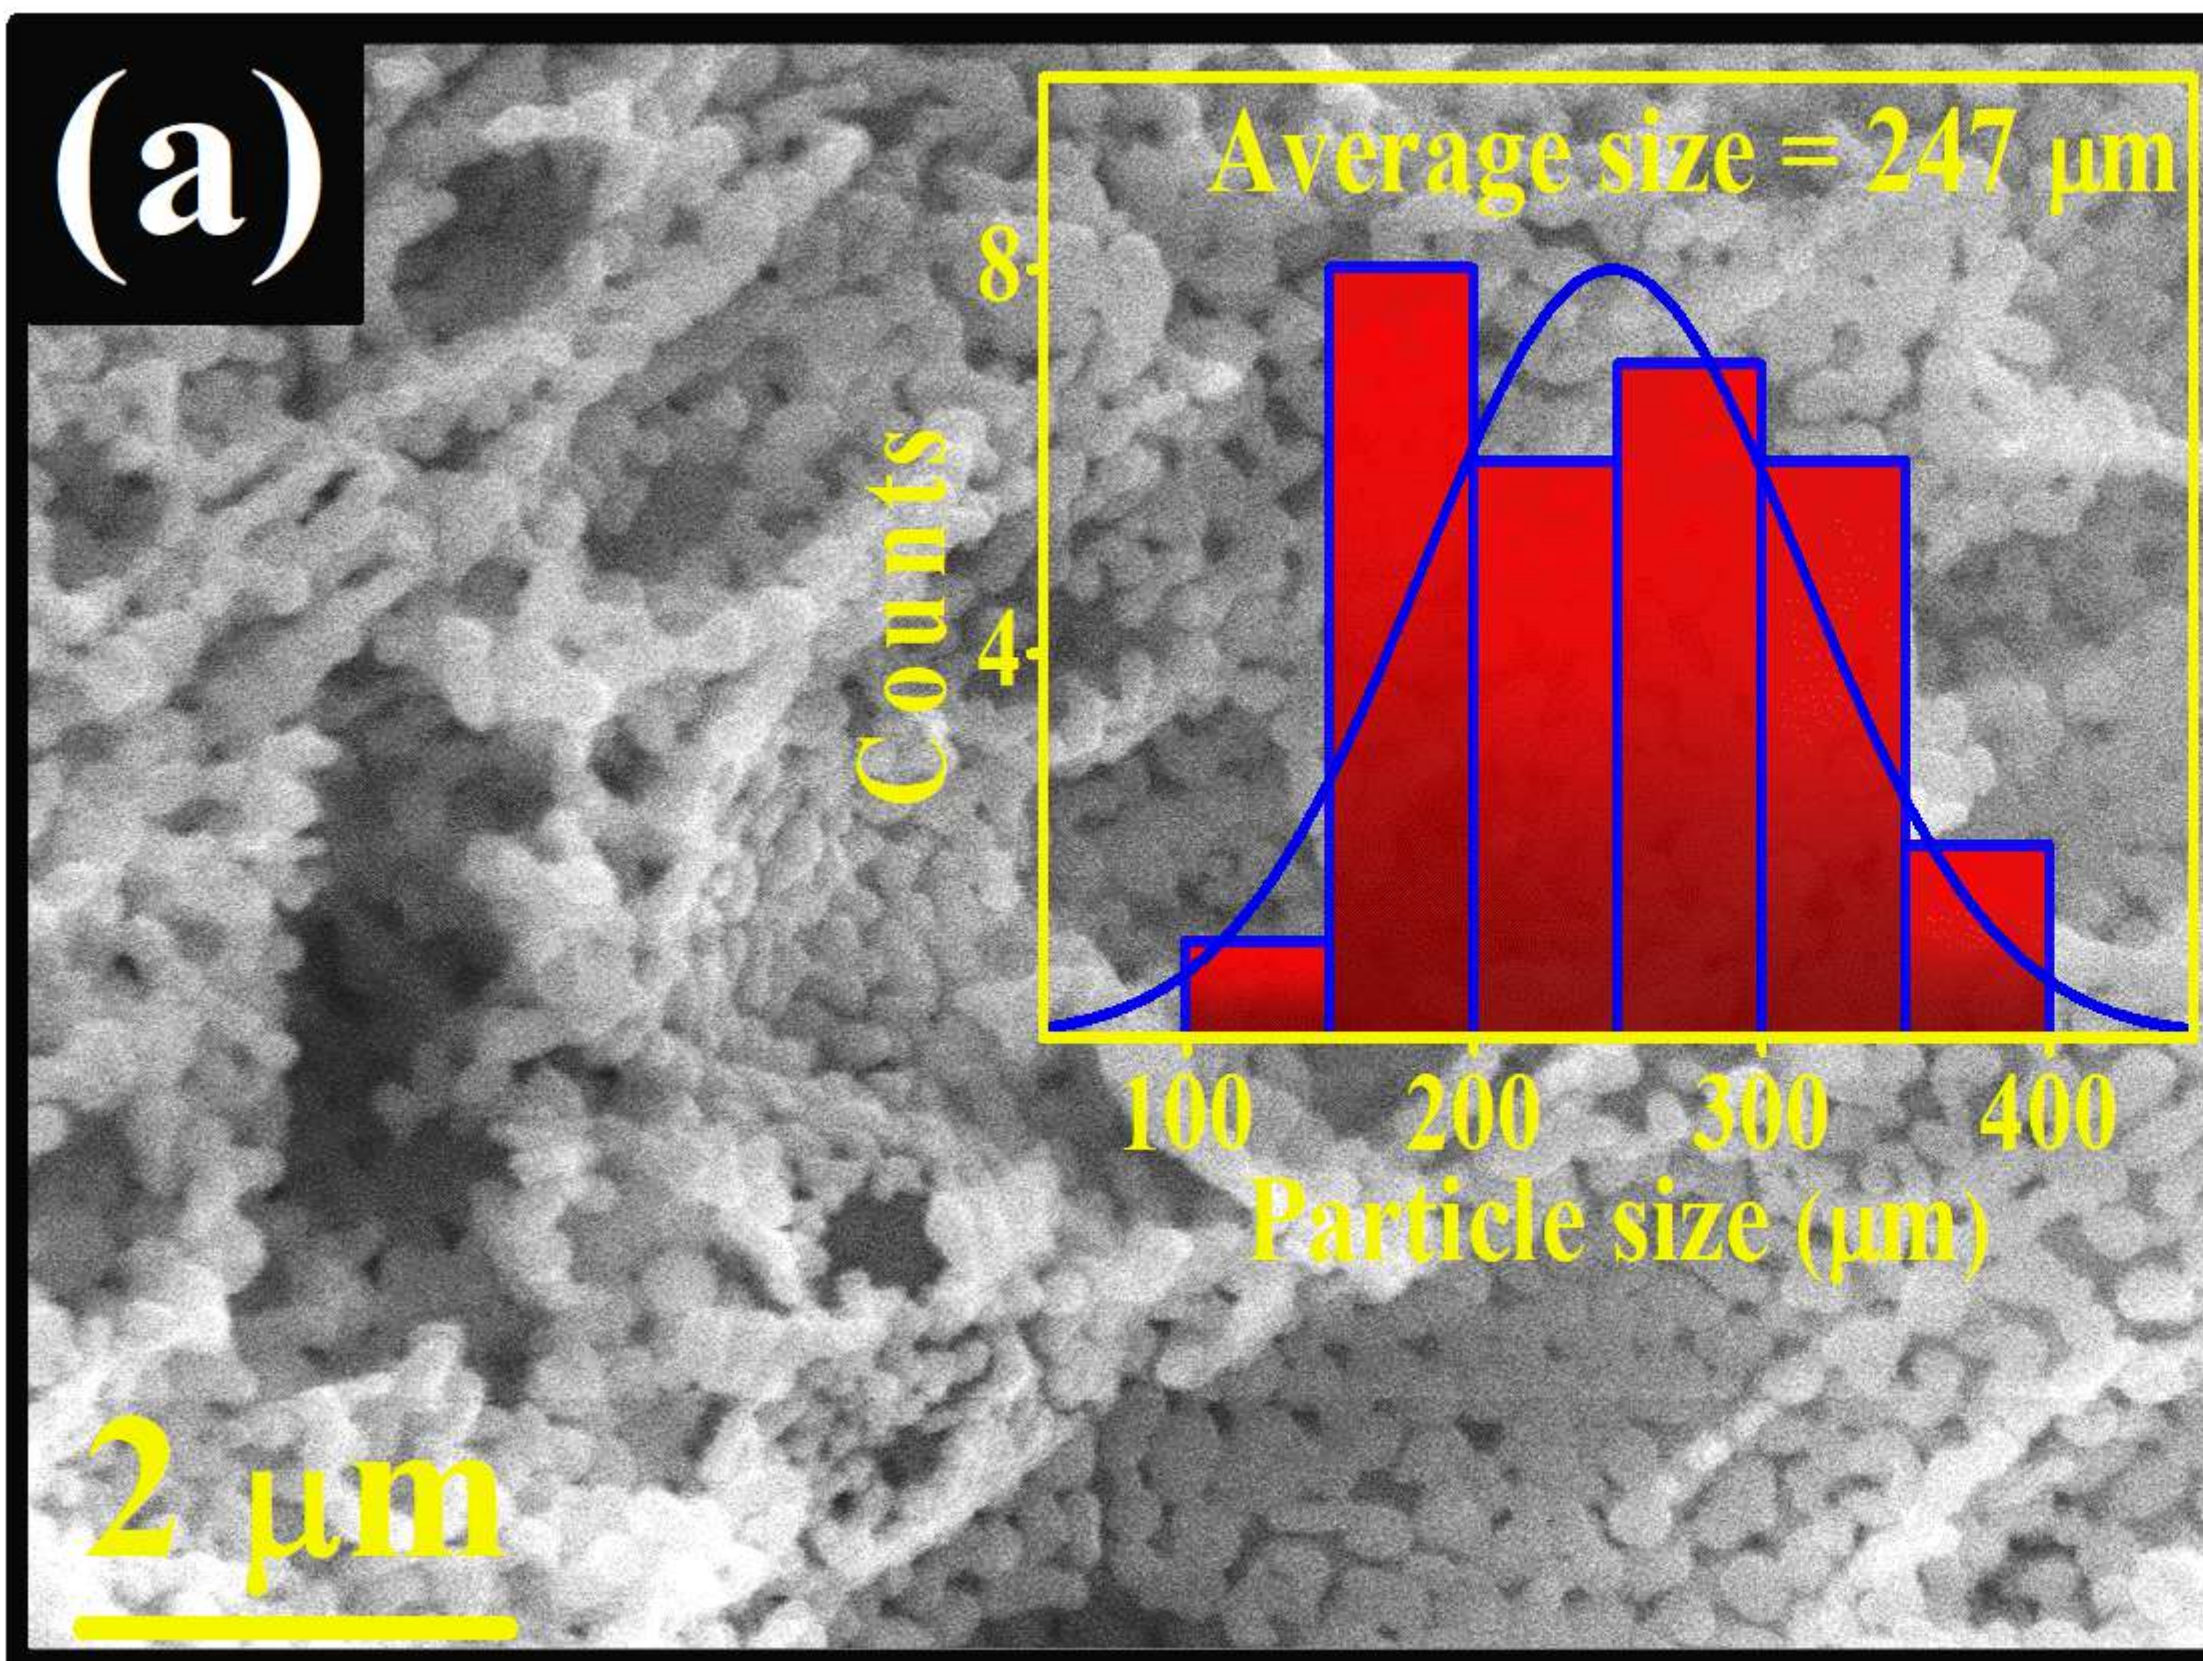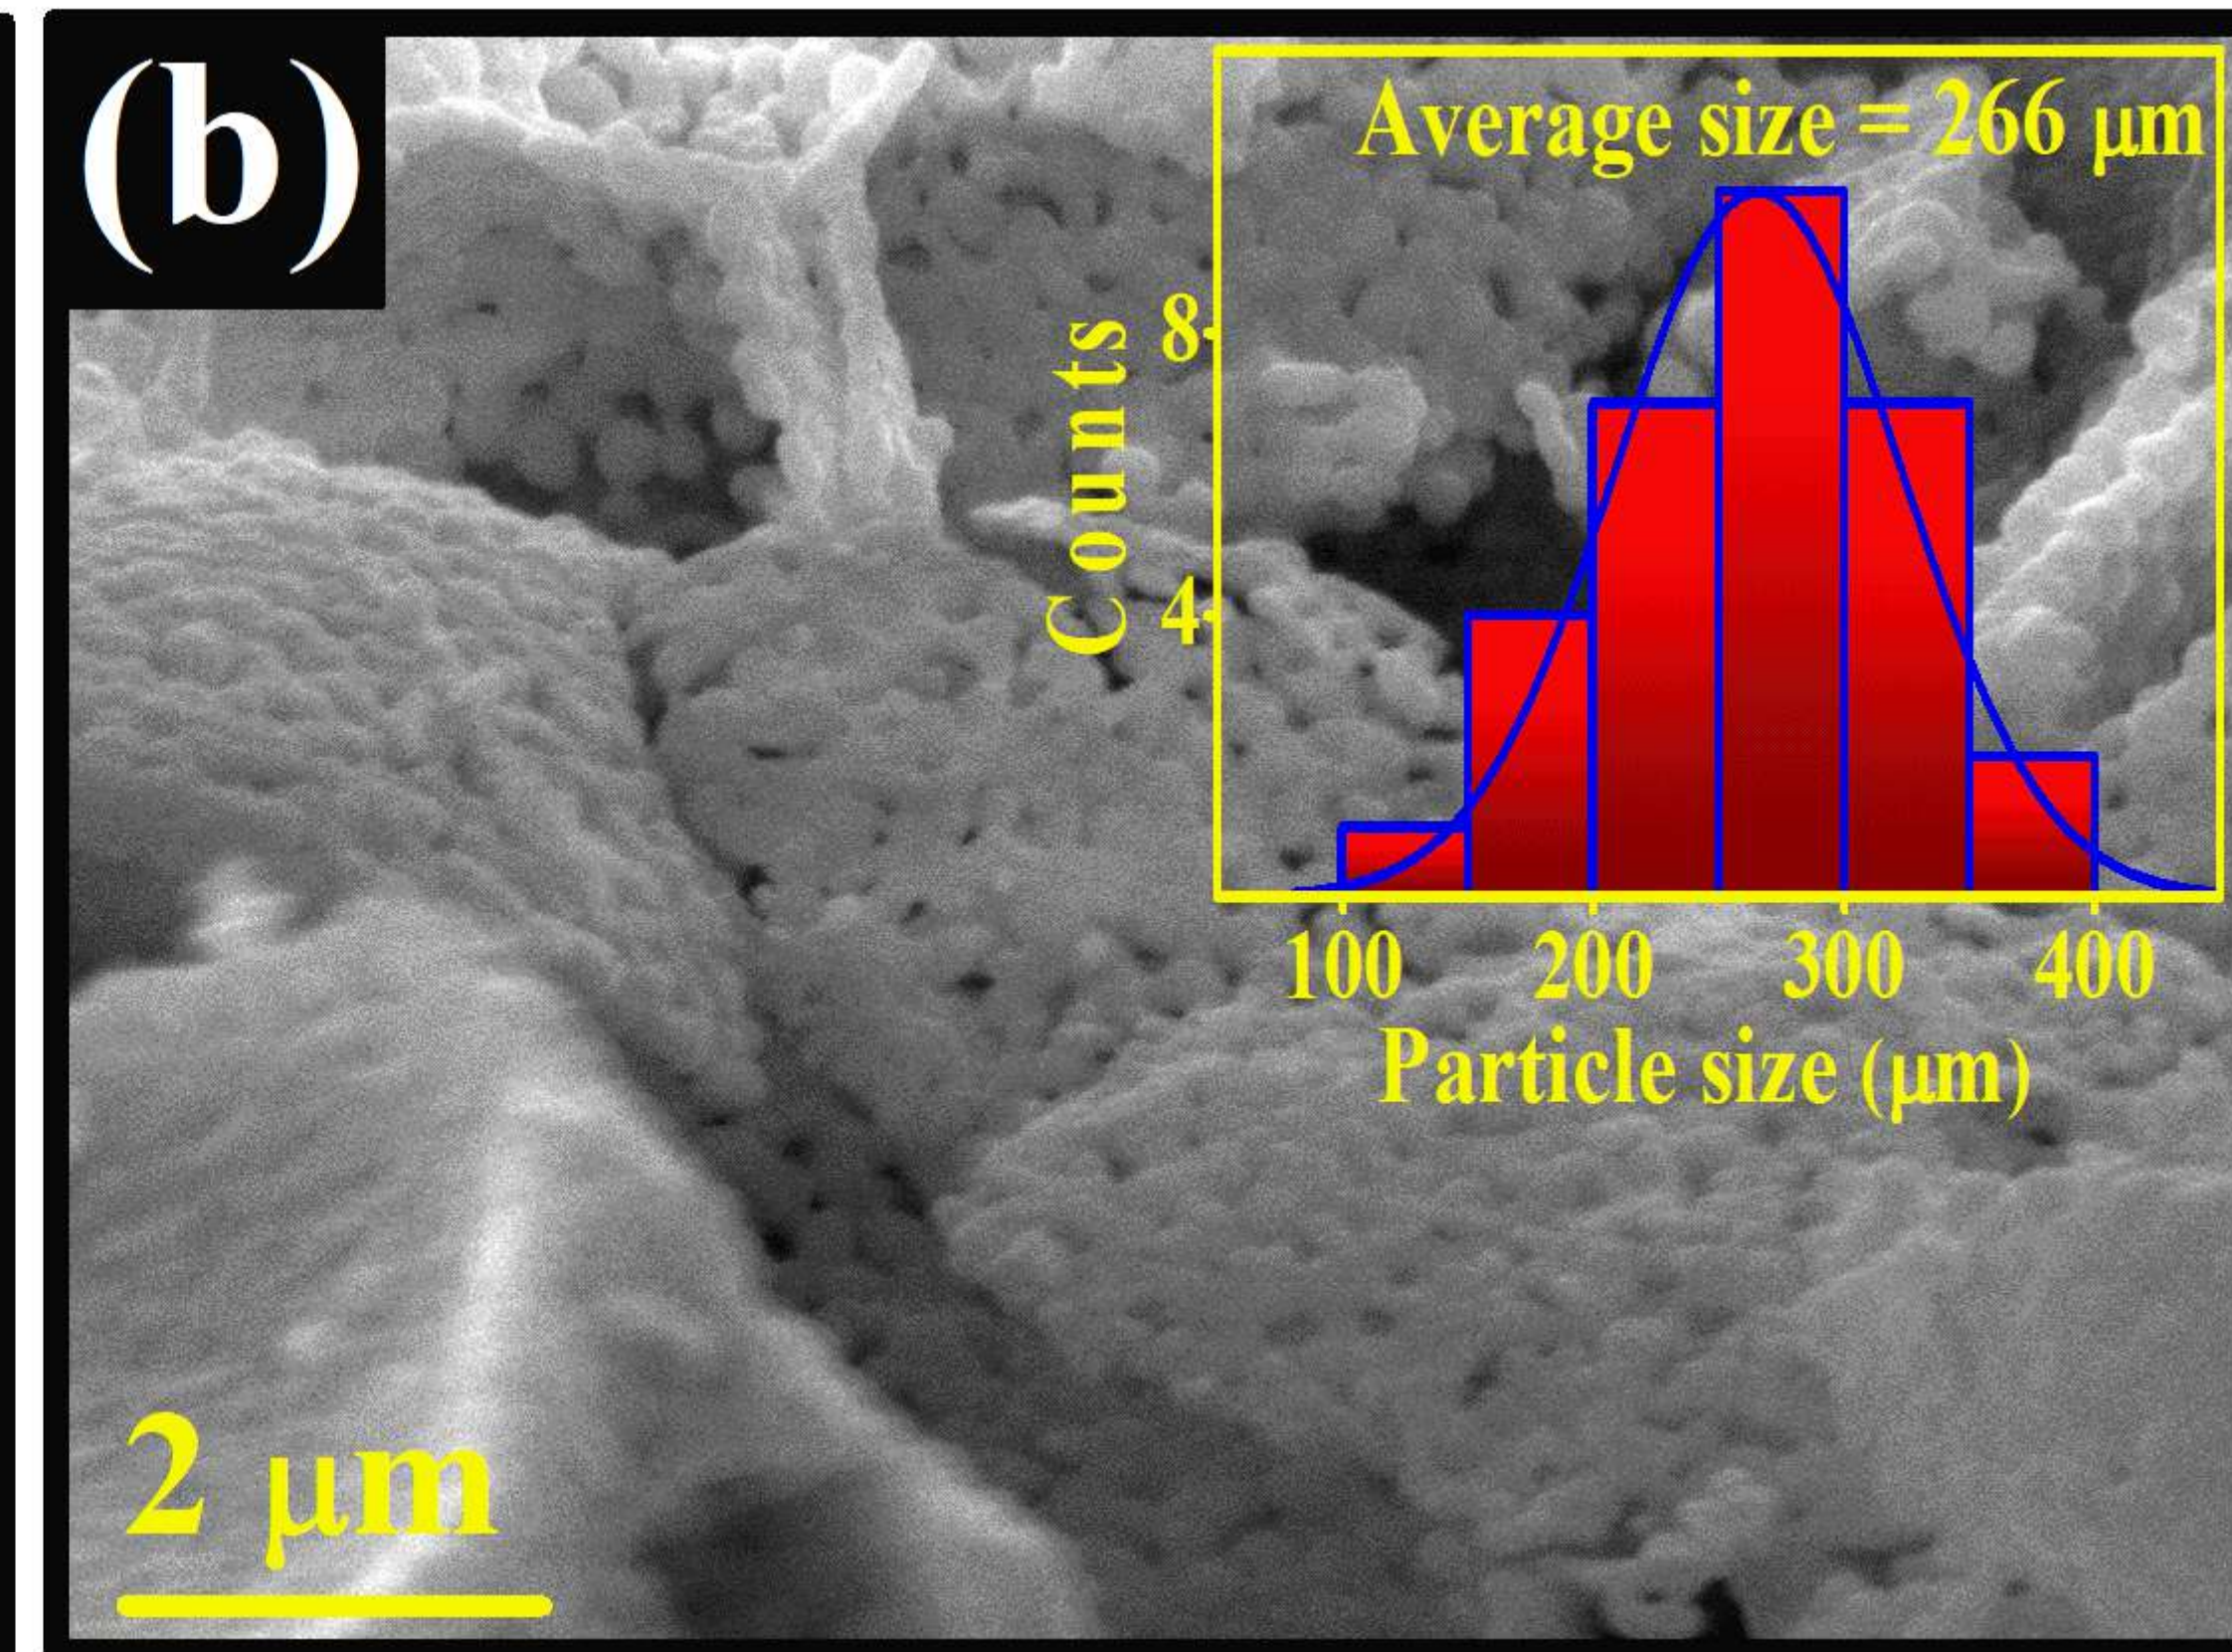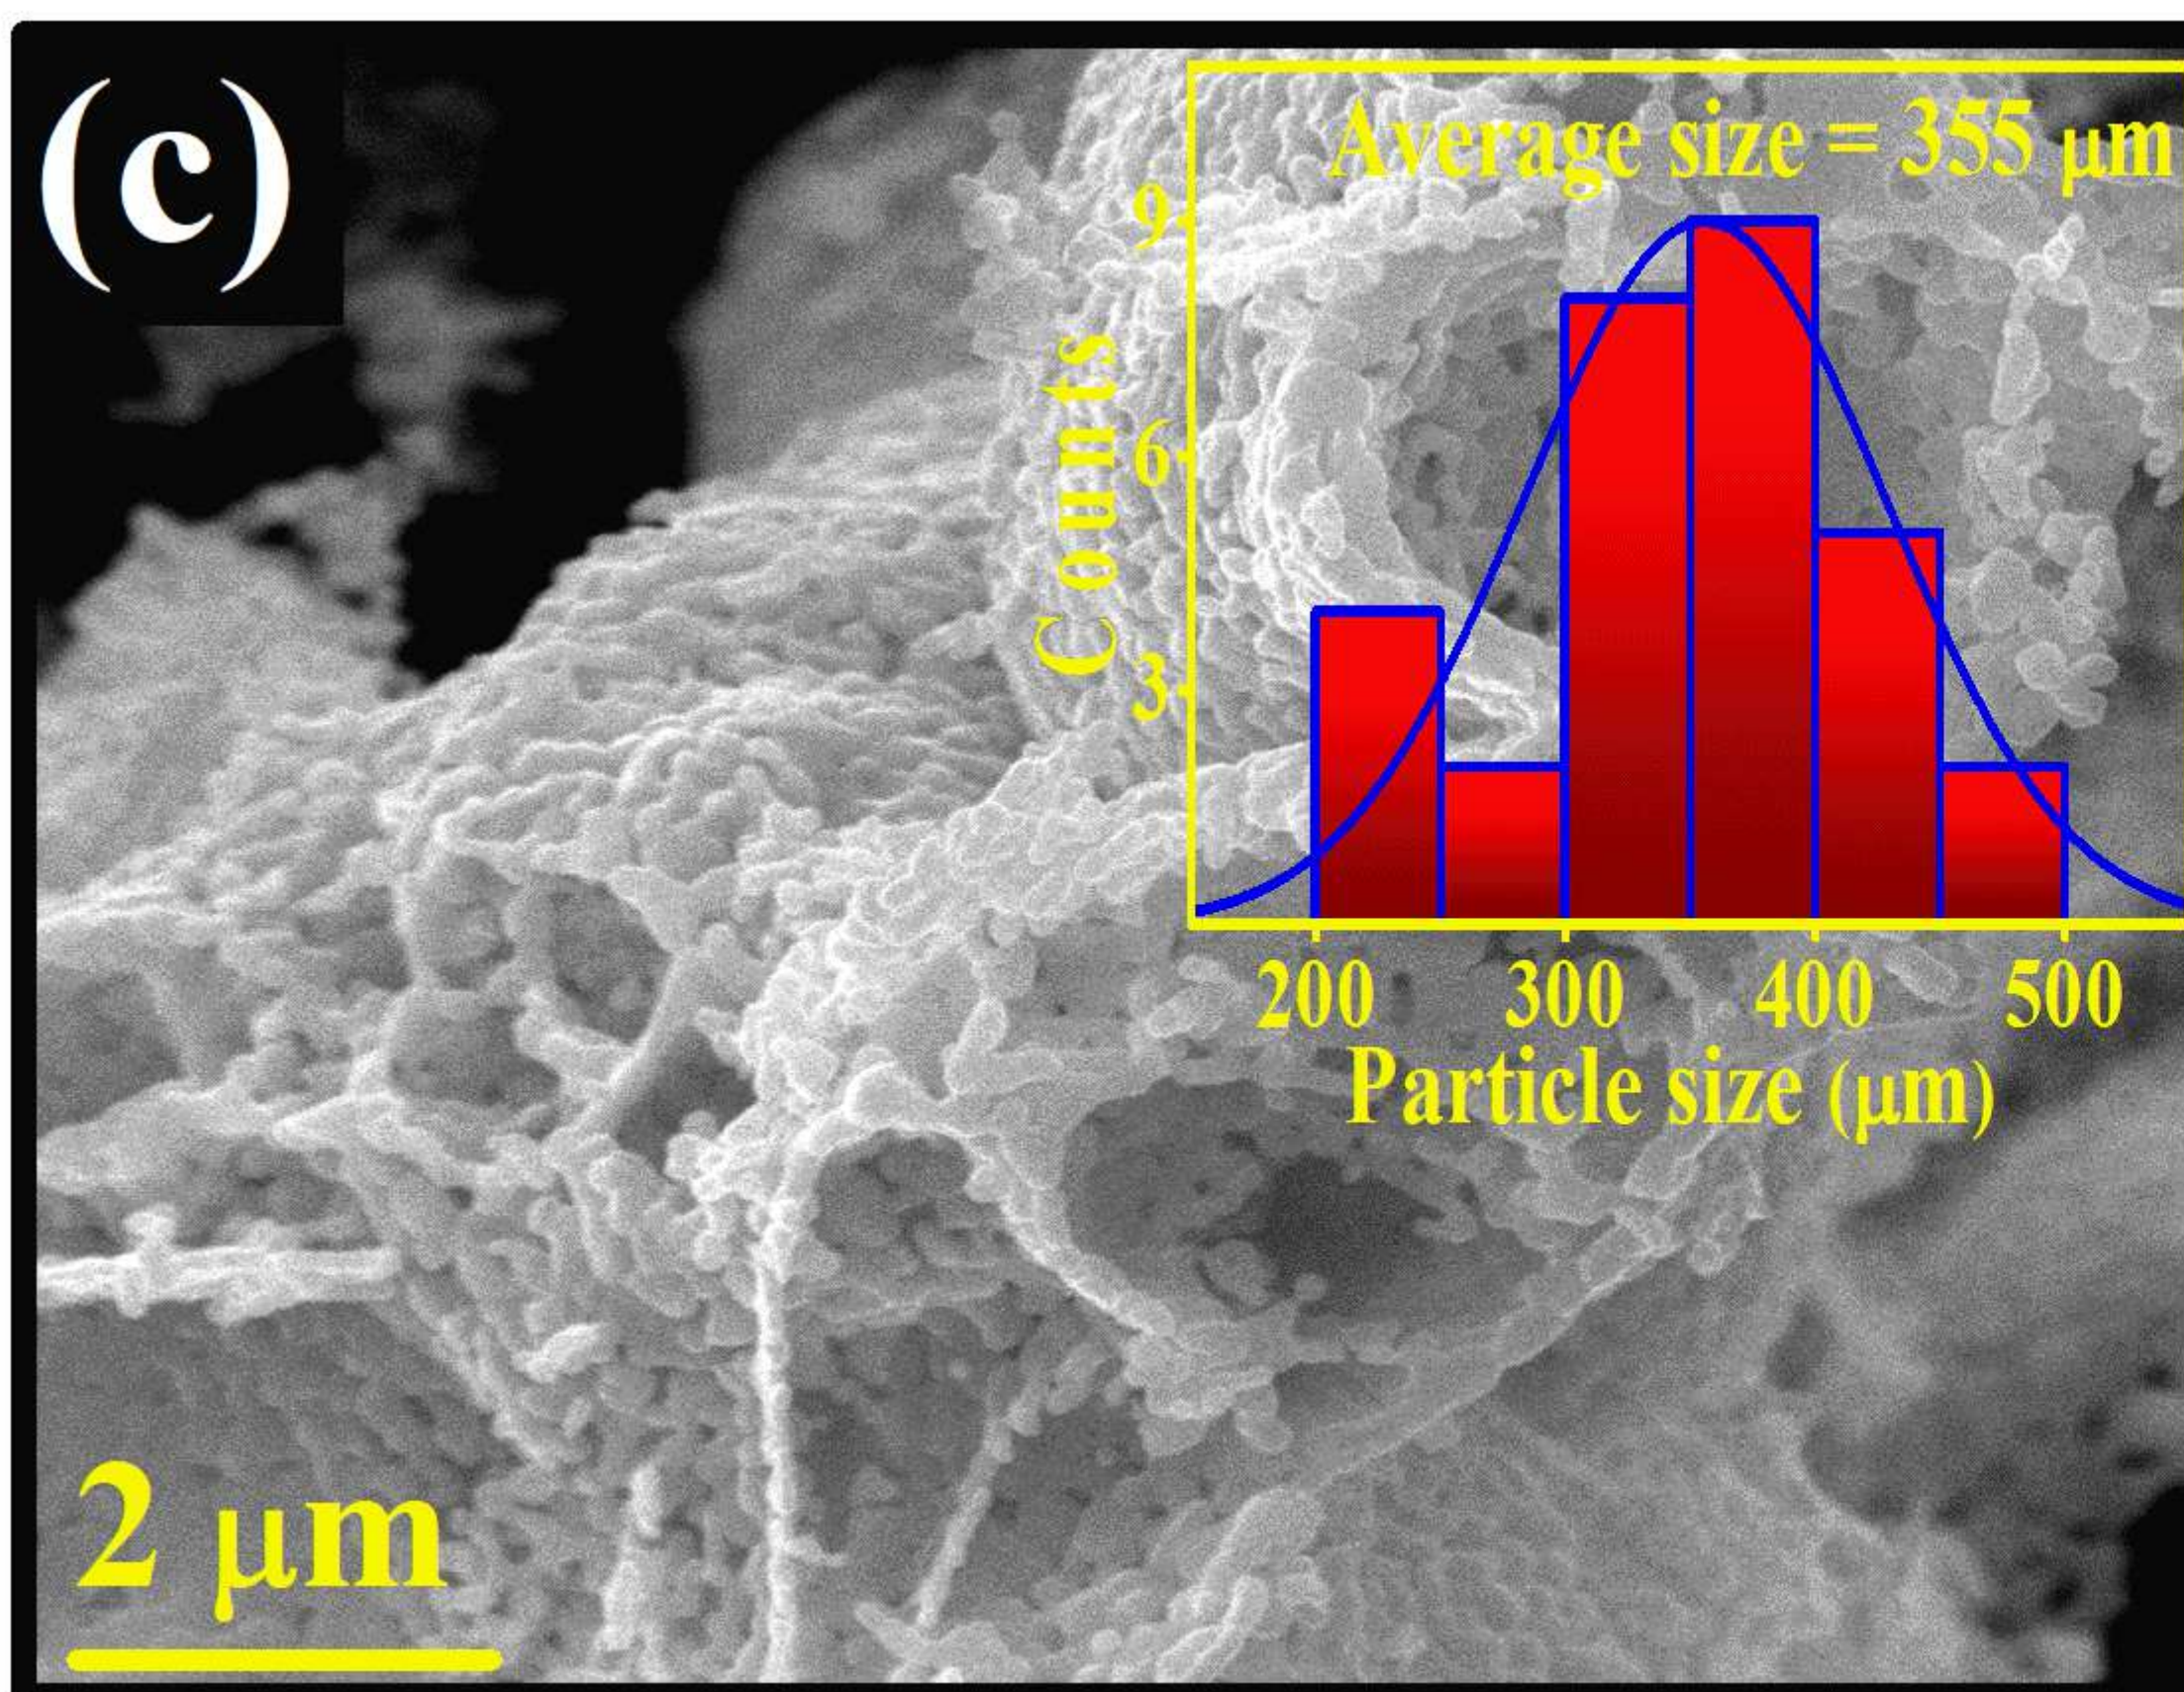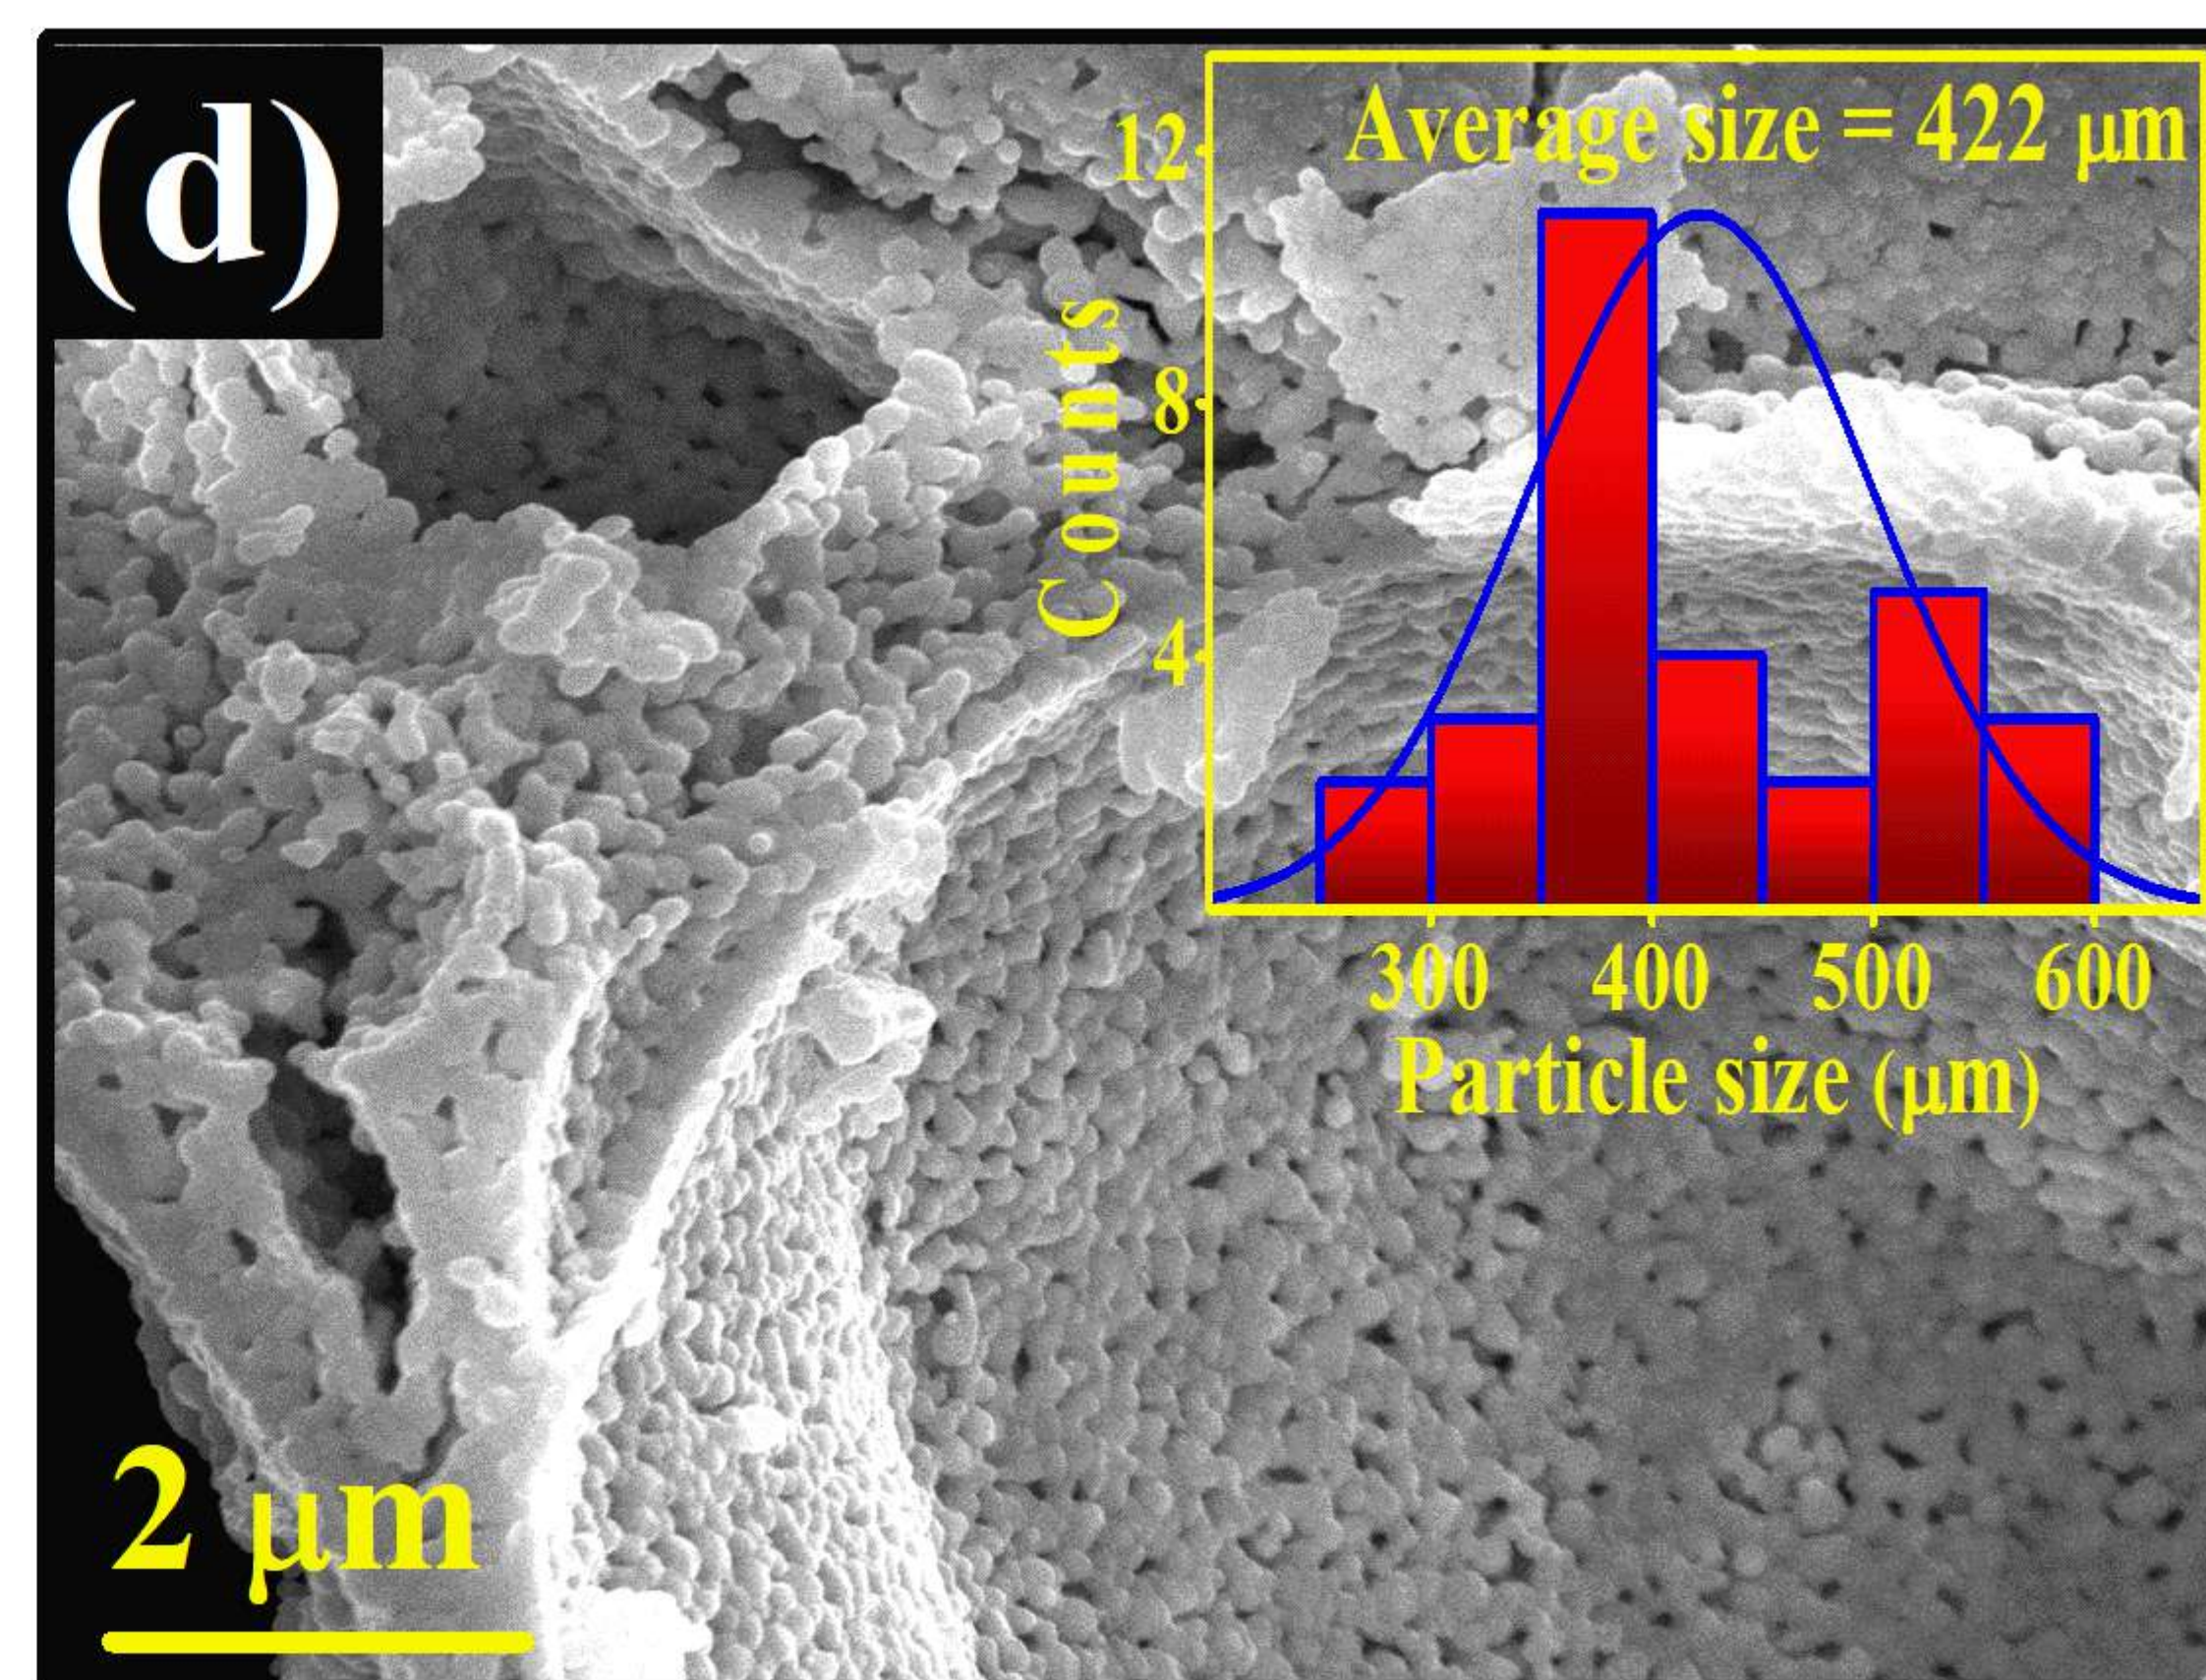

Supplement: d5cp00004a13.pdf [file d5cp00004a13.pdf]

Absorbance (a.u.)

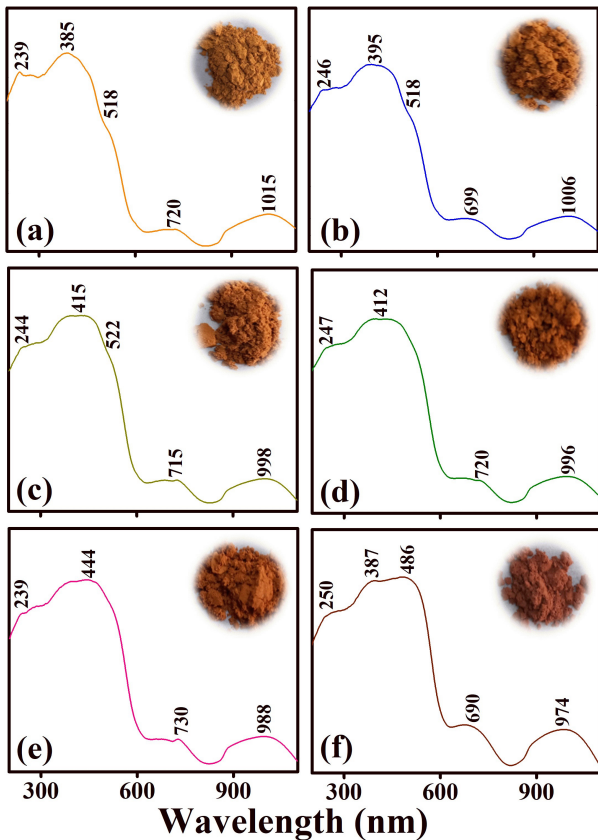

Supplement: d5cp00004a16.pdf [file d5cp00004a16.pdf]

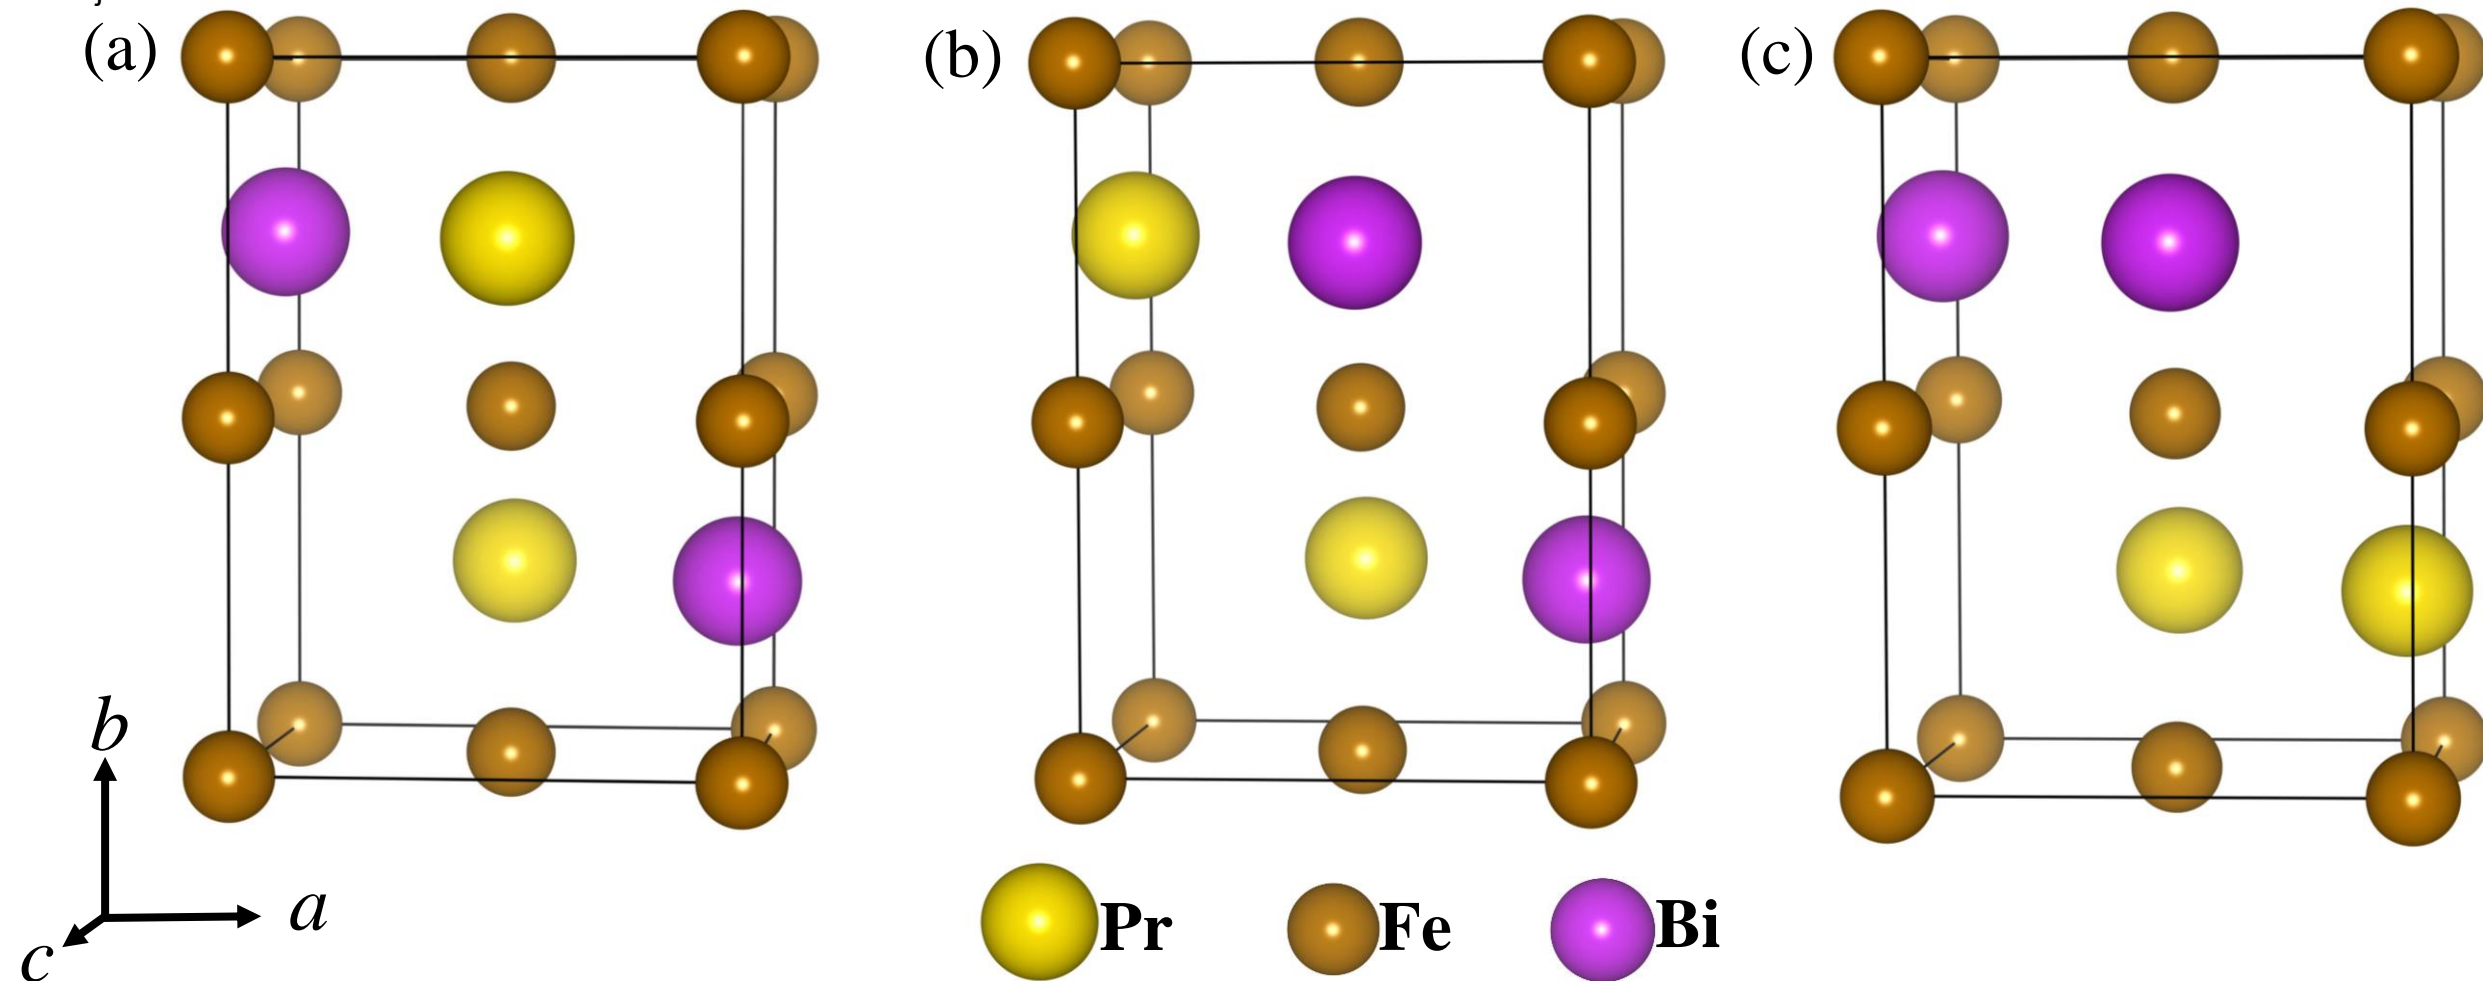

Supplement: d5cp00004a3.pdf [file d5cp00004a3.pdf]

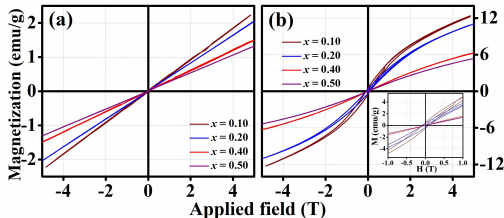

Supplement: d5cp00004a5.pdf [file d5cp00004a5.pdf]
